# Supplementary material
Source: PubMed Central journal article supplement (PMC3567441)
Supplement: NIHMS418331-supplement-01.pdf [file NIHMS418331-supplement-01.pdf]

**Table S1. Single-Neuron Genome Amplification Quality and Identity  
Assessed by SNP Microarray, Related to Figure 2E**

(A) SNP microarray allelic dropout (AD) in 3 single neurons compared to bulk cortex and lung tissue from the same individual. Dropout versus cortex corresponds to data shown in Figure S2C.

(B) Fraction of SNP microarray genotypes concordant between all samples confirms the correct identity of the single neurons. A subset of this data corresponds to Figure 2E. Values  $>0.8$  are highlighted.

(C) Fraction of SNP microarray discordant alleles between all samples further confirms the correct identity of the single neurons. The majority of discordant alleles between 1465 single neurons and 1465 bulk DNA are likely due to lack of an MDA-amplified reference model in Affymetrix data analysis software, rather than mutations occurring during amplification which occur at a rate of  $\sim 10^{-4}$ - $10^{-5}$  (Esteban et al., 1993; Hou et al., 2012; Wang et al., 2012). Values  $\leq 0.02$  are highlighted.

**A**

| <b>Allelic dropout</b> |                                  | <u>Reference</u>                       |                                      |
|------------------------|----------------------------------|----------------------------------------|--------------------------------------|
|                        |                                  | 1465-cortex<br>Unamplified<br>Bulk DNA | 1465-lung<br>Unamplified<br>Bulk DNA |
| <u>Sample</u>          | 1465-cortex Unamplified Bulk DNA |                                        | 0.00                                 |
|                        | 1465-lung Unamplified Bulk DNA   | 0.00                                   |                                      |
|                        | 1465-cortex 1-neuron #6          | 0.08                                   | 0.08                                 |
|                        | 1465-cortex 1-neuron #2          | 0.08                                   | 0.08                                 |
|                        | 1465-cortex 1-neuron #3          | 0.09                                   | 0.09                                 |

**B**

| <b>Fraction concordant genotypes</b> |                                  | 1465-cortex             | 4638-cortex             | 4643-cortex             | 1465-lung               | 4638-lung               | 4643-lung               | 1465-cortex | 1465-cortex | 1465-cortex |
|--------------------------------------|----------------------------------|-------------------------|-------------------------|-------------------------|-------------------------|-------------------------|-------------------------|-------------|-------------|-------------|
|                                      |                                  | Unamplified<br>Bulk DNA | 1-neuron #6 | 1-neuron #2 | 1-neuron #3 |
| <u>Sample</u>                        | 1465-cortex Unamplified Bulk DNA | 1.00                    |                         |                         |                         |                         |                         |             |             |             |
|                                      | 4638-cortex Unamplified Bulk DNA | 0.70                    | 1.00                    |                         |                         |                         |                         |             |             |             |
|                                      | 4643-cortex Unamplified Bulk DNA | 0.70                    | 0.70                    | 1.00                    |                         |                         |                         |             |             |             |
|                                      | 1465-lung Unamplified Bulk DNA   | 1.00                    | 0.70                    | 0.70                    | 1.00                    |                         |                         |             |             |             |
|                                      | 4638-lung Unamplified Bulk DNA   | 0.71                    | 0.99                    | 0.71                    | 0.72                    | 1.00                    |                         |             |             |             |
|                                      | 4643-lung Unamplified Bulk DNA   | 0.72                    | 0.71                    | 1.00                    | 0.72                    | 0.72                    | 1.00                    |             |             |             |
|                                      | 1465-cortex 1-neuron #6          | 0.95                    | 0.68                    | 0.68                    | 0.95                    | 0.70                    | 0.70                    | 1.00        |             |             |
|                                      | 1465-cortex 1-neuron #2          | 0.95                    | 0.68                    | 0.68                    | 0.95                    | 0.69                    | 0.70                    | 0.96        | 1.00        |             |
|                                      | 1465-cortex 1-neuron #3          | 0.95                    | 0.68                    | 0.68                    | 0.95                    | 0.69                    | 0.70                    | 0.96        | 0.96        | 1.00        |

**C**

| <b>Fraction discordant alleles</b> |                                  | <u>Reference</u>                       |                                        |                                        |                                      |                                      |                                      |                            |                            |                            |
|------------------------------------|----------------------------------|----------------------------------------|----------------------------------------|----------------------------------------|--------------------------------------|--------------------------------------|--------------------------------------|----------------------------|----------------------------|----------------------------|
|                                    |                                  | 1465-cortex<br>Unamplified<br>Bulk DNA | 4638-cortex<br>Unamplified<br>Bulk DNA | 4643-cortex<br>Unamplified<br>Bulk DNA | 1465-lung<br>Unamplified<br>Bulk DNA | 4638-lung<br>Unamplified<br>Bulk DNA | 4643-lung<br>Unamplified<br>Bulk DNA | 1465-cortex<br>1-neuron #6 | 1465-cortex<br>1-neuron #2 | 1465-cortex<br>1-neuron #3 |
| <u>Sample</u>                      | 1465-cortex Unamplified Bulk DNA | 0.00                                   | 0.15                                   | 0.15                                   | 0.00                                 | 0.14                                 | 0.14                                 | 0.02                       | 0.02                       | 0.02                       |
|                                    | 4638-cortex Unamplified Bulk DNA | 0.14                                   | 0.00                                   | 0.14                                   | 0.14                                 | 0.00                                 | 0.14                                 | 0.16                       | 0.16                       | 0.16                       |
|                                    | 4643-cortex Unamplified Bulk DNA | 0.15                                   | 0.14                                   | 0.00                                   | 0.15                                 | 0.14                                 | 0.00                                 | 0.16                       | 0.16                       | 0.16                       |
|                                    | 1465-lung Unamplified Bulk DNA   | 0.00                                   | 0.15                                   | 0.15                                   | 0.00                                 | 0.14                                 | 0.14                                 | 0.02                       | 0.01                       | 0.02                       |
|                                    | 4638-lung Unamplified Bulk DNA   | 0.14                                   | 0.00                                   | 0.14                                   | 0.14                                 | 0.00                                 | 0.13                                 | 0.15                       | 0.15                       | 0.15                       |
|                                    | 4643-lung Unamplified Bulk DNA   | 0.13                                   | 0.14                                   | 0.00                                   | 0.13                                 | 0.13                                 | 0.00                                 | 0.15                       | 0.15                       | 0.15                       |
|                                    | 1465-cortex 1-neuron #6          | 0.02                                   | 0.17                                   | 0.17                                   | 0.02                                 | 0.16                                 | 0.16                                 | 0.00                       | 0.01                       | 0.01                       |
|                                    | 1465-cortex 1-neuron #2          | 0.02                                   | 0.18                                   | 0.17                                   | 0.02                                 | 0.17                                 | 0.16                                 | 0.01                       | 0.00                       | 0.01                       |
|                                    | 1465-cortex 1-neuron #3          | 0.02                                   | 0.17                                   | 0.17                                   | 0.02                                 | 0.16                                 | 0.16                                 | 0.01                       | 0.01                       | 0.00                       |

**Table S4. Percent Mosaicism in HMG-3 of the AKT3 E17K Mutation,  
Assessed by Bulk and Single-Cell Sequencing, Related to Figure 7**

Mosaicism in bulk samples (bulk tissue extracted DNA, 10,000-, 1,000-, 100-, and 10-cells) was calculated by relative peak heights of the mutant and normal alleles in Sanger sequencing traces, and in some cases also by TOPO cloning of PCR products. Mosaicism in single-cell samples was calculated by direct counting of cells with a detectable mutant allele (corrected for allelic dropout, AD, as described in Extended Experimental Procedures). Tissue location numbers refer to two locations in the tissue separated by ~5cm, and letters represent separate pieces of tissue from each location.

| Tissue-Location                | Sample type (sort gate)  | MDA amplified | Assessed by                         | Sanger allele peak height quantification |                                                                      | TOPO cloning and single-cell experiments                           |                         | Calculated % mosaicism | % mosaicism std. error |
|--------------------------------|--------------------------|---------------|-------------------------------------|------------------------------------------|----------------------------------------------------------------------|--------------------------------------------------------------------|-------------------------|------------------------|------------------------|
|                                |                          |               |                                     | Number of traces                         | % mutant allele (corrected for background signal in normal controls) | # mutant clones or cells (accounting for AD in single-cell expts.) | Total # clones or cells |                        |                        |
| Blood <sup>1</sup>             | Bulk DNA                 | N             | Sanger allele peak heights          | 1                                        | -0.3                                                                 |                                                                    |                         | <b>-0.6</b>            | NA                     |
| Brain-location 1a              | Bulk DNA                 | N             | Sanger allele peak heights          | 2                                        | 8.6                                                                  |                                                                    |                         | <b>17.2</b>            | ±0.7                   |
| Brain-location 1a <sup>1</sup> | Bulk DNA                 | N             | TOPO cloning                        |                                          |                                                                      | 4                                                                  | 23                      | <b>34.8</b>            | ±15.8                  |
| Brain-location 2a              | Bulk DNA                 | N             | Sanger allele peak heights          | 2                                        | 14.2                                                                 |                                                                    |                         | <b>28.4</b>            | ±0.6                   |
| Brain-location 2a <sup>1</sup> | Bulk DNA                 | N             | TOPO cloning                        |                                          |                                                                      | 4                                                                  | 23                      | <b>34.8</b>            | ±15.8                  |
| Brain-location 1b              | 10,000-unsorted nuclei   | Y             | Sanger allele peak heights          | 4                                        | 14.2                                                                 |                                                                    |                         | <b>28.5</b>            | ±1.4                   |
| Brain-location 1b              | 1,000-unsorted nuclei    | Y             | Sanger allele peak heights          | 4                                        | 13.1                                                                 |                                                                    |                         | <b>26.2</b>            | ±2.0                   |
| Brain-location 1c              | 1,000-nuclei (NeuN+)     | Y             | Sanger allele peak heights          | 1                                        | 11.0                                                                 |                                                                    |                         | <b>21.9</b>            | NA                     |
| Brain-location 1c              | 1,000-nuclei (NeuN+)     | Y             | TOPO cloning                        |                                          |                                                                      | 3                                                                  | 29                      | <b>20.7</b>            | ±11.3                  |
| Brain-location 1c              | 1,000-nuclei (NeuN-)     | Y             | Sanger allele peak heights          | 1                                        | 8.2                                                                  |                                                                    |                         | <b>16.4</b>            | NA                     |
| Brain-location 1c              | 1,000-nuclei (NeuN-)     | Y             | TOPO cloning                        |                                          |                                                                      | 4                                                                  | 24                      | <b>33.3</b>            | ±15.2                  |
| Brain-location 1b              | 100-nuclei (NeuN+)       | Y             | Sanger allele peak heights          | 1                                        | 16.5                                                                 |                                                                    |                         | <b>33.0</b>            | NA                     |
| Brain-location 1b              | 10-nuclei (NeuN+)        | Y             | Sanger allele peak heights          | 5                                        | 14.5                                                                 |                                                                    |                         | <b>29.0</b>            | ±6.4                   |
| Brain-location 1b              | 1-nucleus (NeuN+)        | Y             | Single-cell mutant allele detection |                                          |                                                                      | 17                                                                 | 44                      | <b>38.6</b>            | ±7.3                   |
| Brain-location 1b              | 1-nucleus (NeuN-)        | Y             | Single-cell mutant allele detection |                                          |                                                                      | 9                                                                  | 33                      | <b>27.3</b>            | ±7.8                   |
| Brain-location 1b              | 1-nucleus (large nuclei) | Y             | Single-cell mutant allele detection |                                          |                                                                      | 10                                                                 | 32                      | <b>31.3</b>            | ±8.2                   |
| Brain-location 1b              | 1-nucleus (wide nuclei)  | Y             | Single-cell mutant allele detection |                                          |                                                                      | 8                                                                  | 17                      | <b>47.1</b>            | ±12.1                  |

<sup>1</sup> From Poduri, et al. (2012)

**Table S6. 3'PCR and Full-Length PCR Protocols, Related to Experimental Procedures**

Master mix recipes and thermal cycling conditions used for 3'PCR and FL-PCR.

A

| <b>3'PCR master mix</b>              | <b>Amount</b> | <b>3'PCR program</b> |             |          |        |
|--------------------------------------|---------------|----------------------|-------------|----------|--------|
|                                      |               | Steps                | Temperature | Duration | Cycles |
| 5X GoTaq flexi buffer                | 4ul           |                      |             |          |        |
| MgCl <sub>2</sub> (25uM)             | 1.2ul         | 1                    | 95          | 5min     |        |
| dNTP (10uM)                          | 0.4ul         | 2                    | 95          | 30sec    |        |
| GoTaq Hot Start polymerase (Promega) | 0.2ul         | 3                    | 60          | 30sec    |        |
| AC-22 primer                         | 0.8uM         | 4                    | 72          | 1min     |        |
| Primer 5'                            | 0.8uM         | 5                    |             |          | 35X    |
| DNA template                         | 5ng           | 6                    | 72          | 5min     |        |
| Total reaction volume                | 20ul          | 7                    | 4           | hold     |        |

B

| <b>FL-PCR master mix</b> | <b>Amount</b> | <b>FL-PCR program</b> |             |          |        |
|--------------------------|---------------|-----------------------|-------------|----------|--------|
|                          |               | Steps                 | Temperature | Duration | Cycles |
| 10X LA Taq buffer        | 2ul           |                       |             |          |        |
| dNTP                     | 3.2ul         | 1                     | 94          | 90sec    |        |
| LA Taq (Takara Bio)      | 0.2ul         | 2                     | 94          | 20sec    |        |
| Primer 5'                | 0.5uM         | 3                     | 61          | 20sec    |        |
| Primer 3'                | 0.5uM         | 4                     | 68          | 8:30min  |        |
| DNA template             | 10ng          | 5                     |             |          | 32X    |
| Total reaction volume    | 20ul          | 6                     | 68          | 10min    |        |
|                          |               | 7                     | 4           | hold     |        |
