# Supplementary material
Source: PubMed Central journal article supplement (PMC3567441)

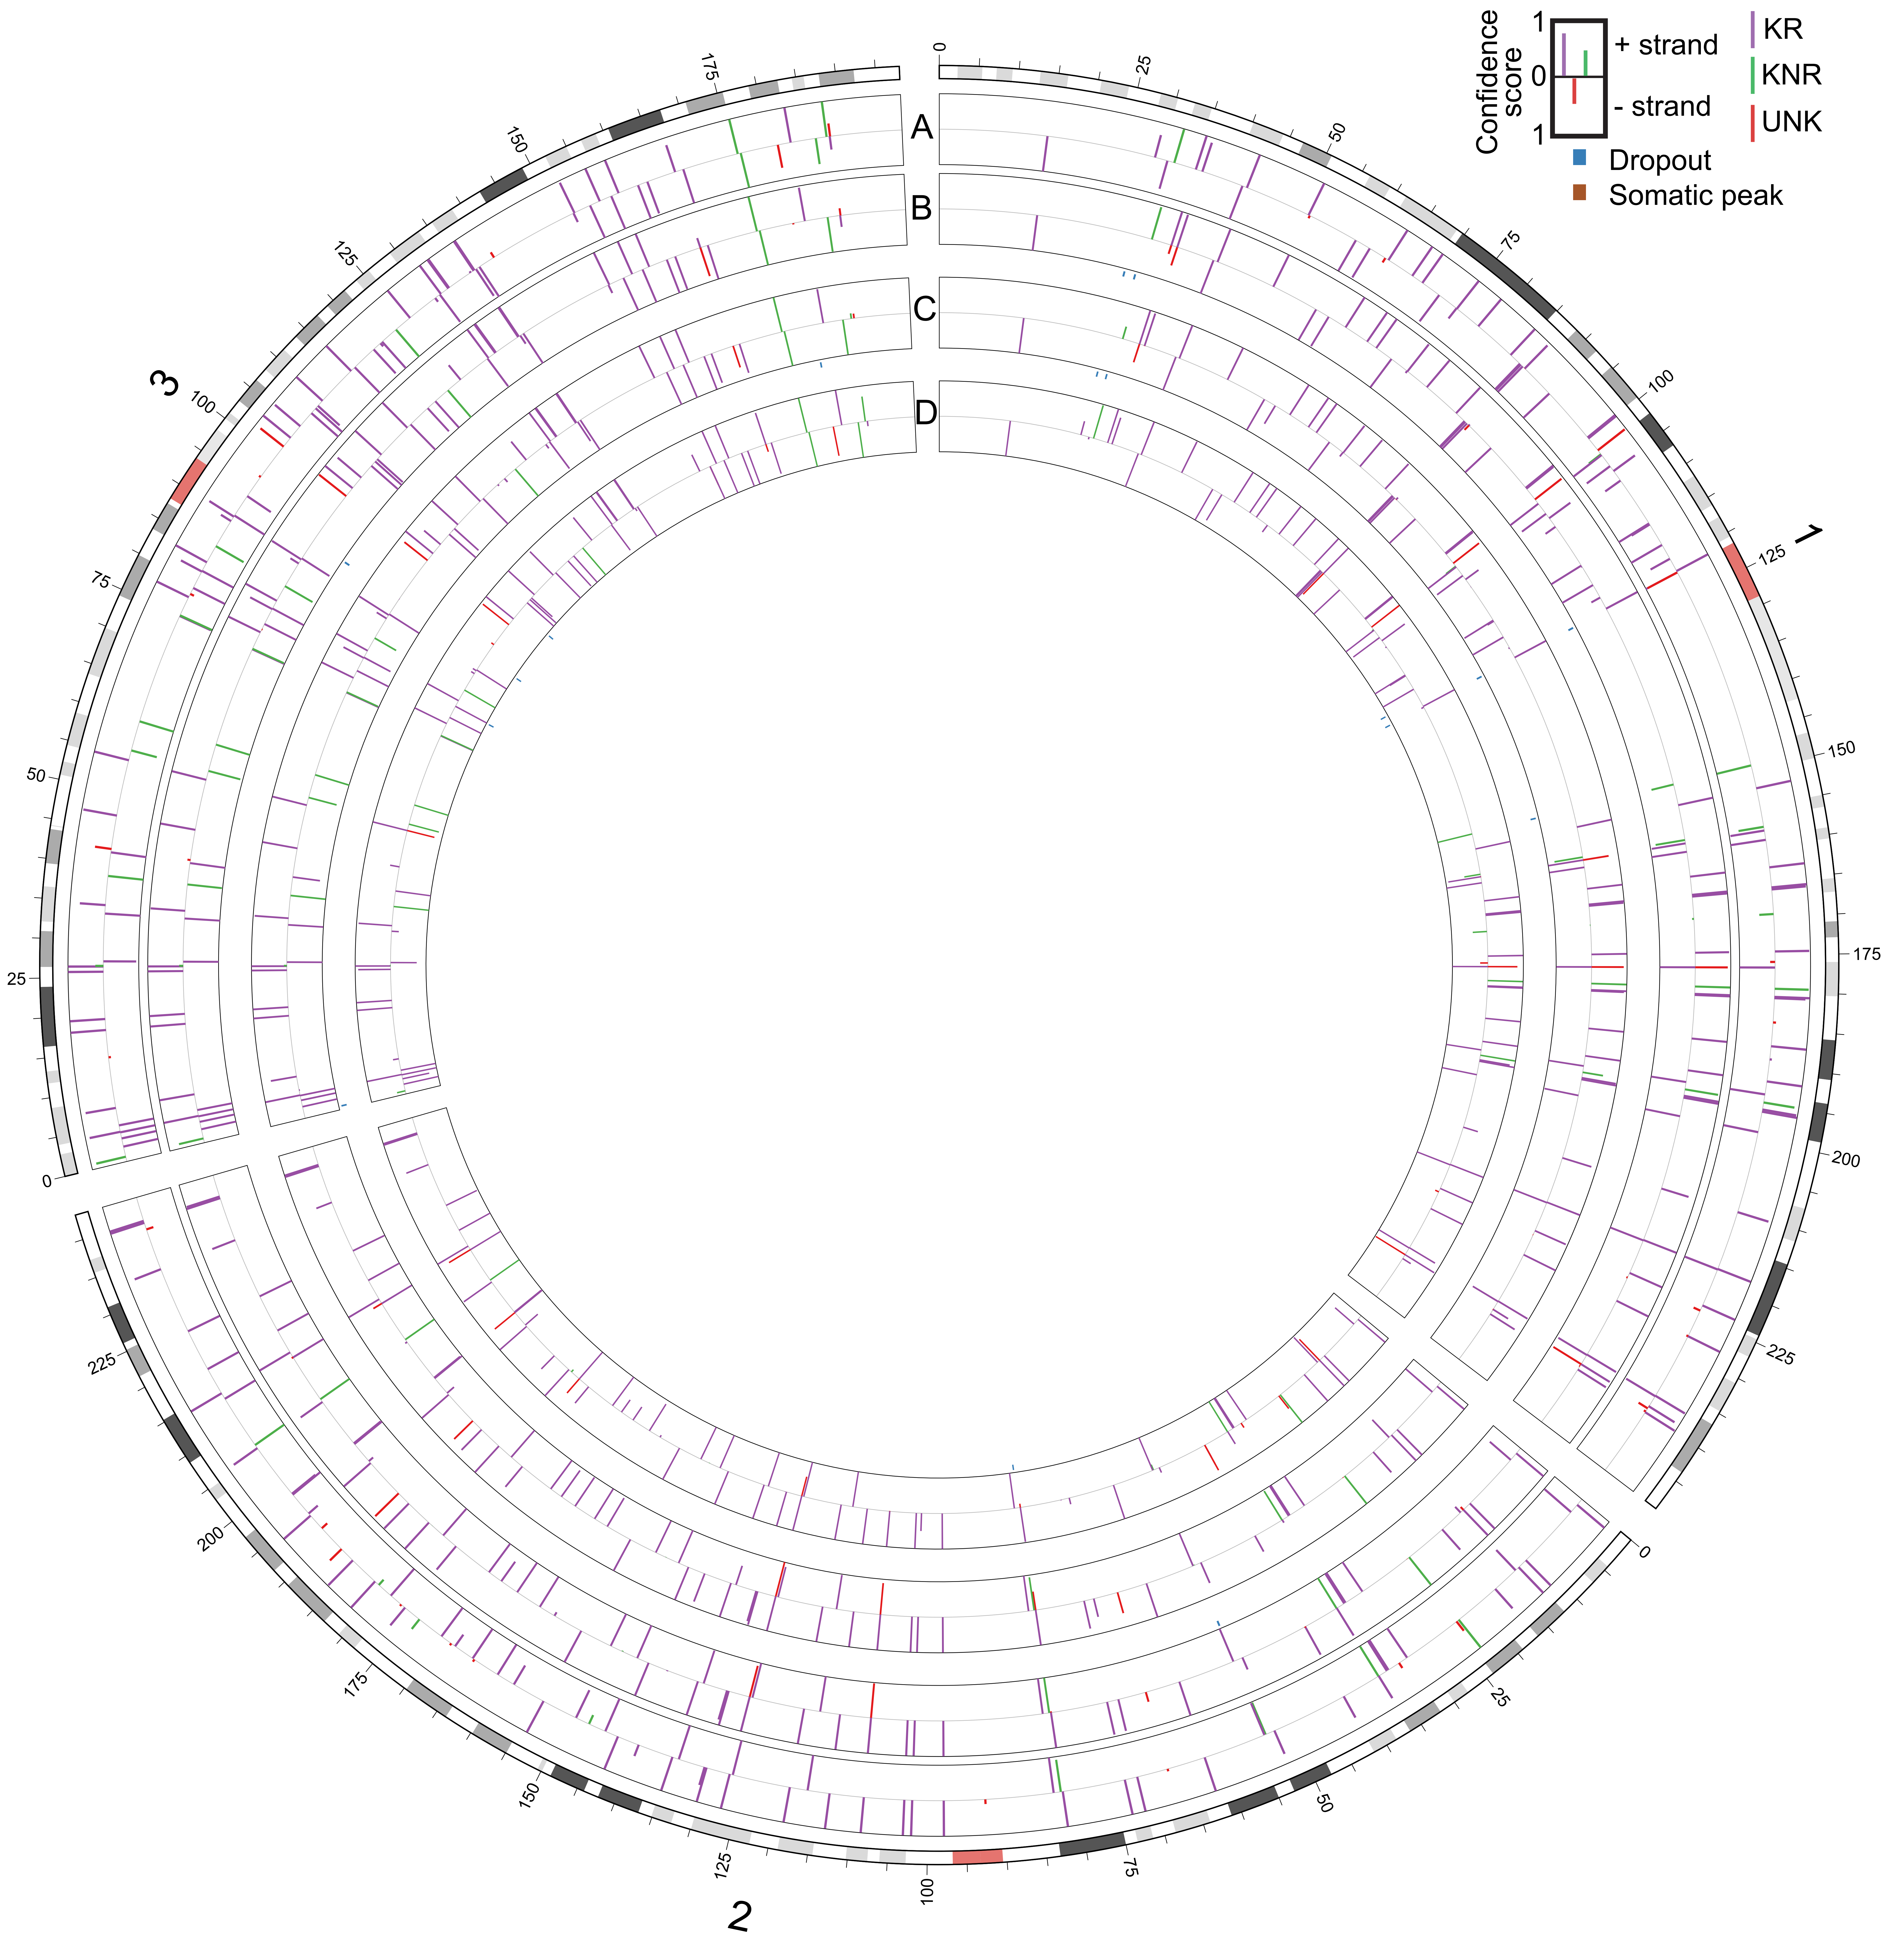

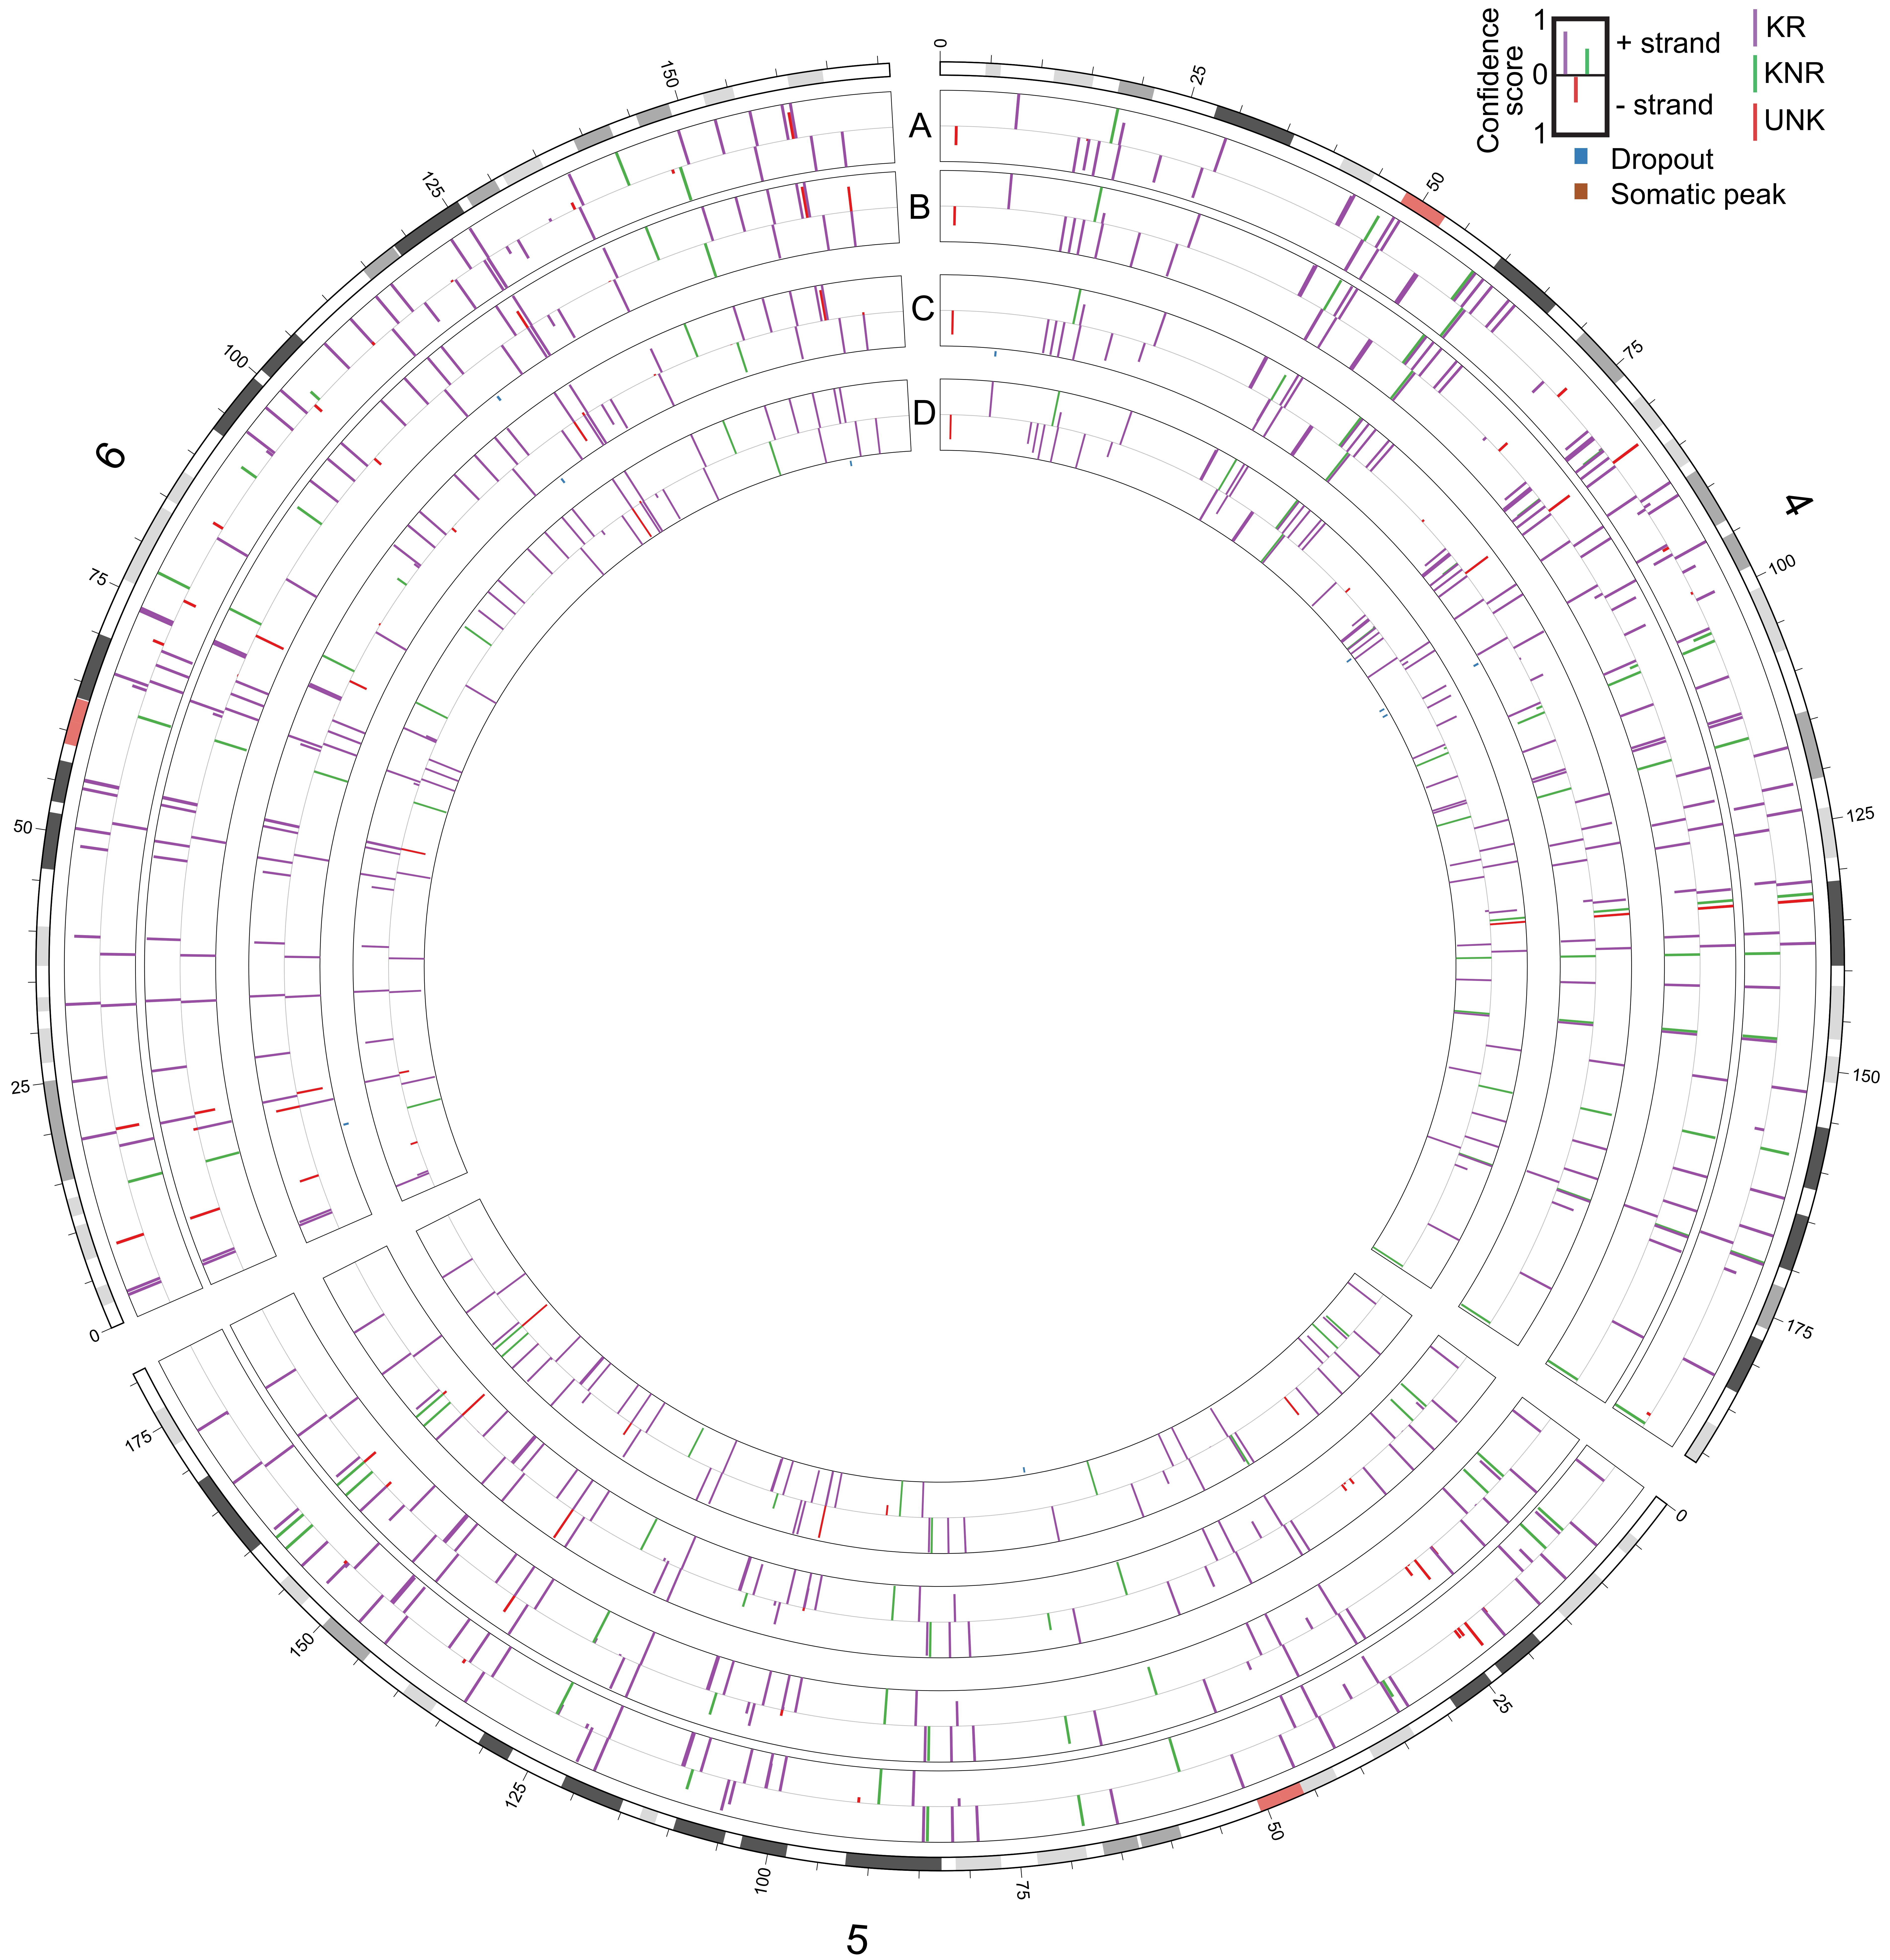

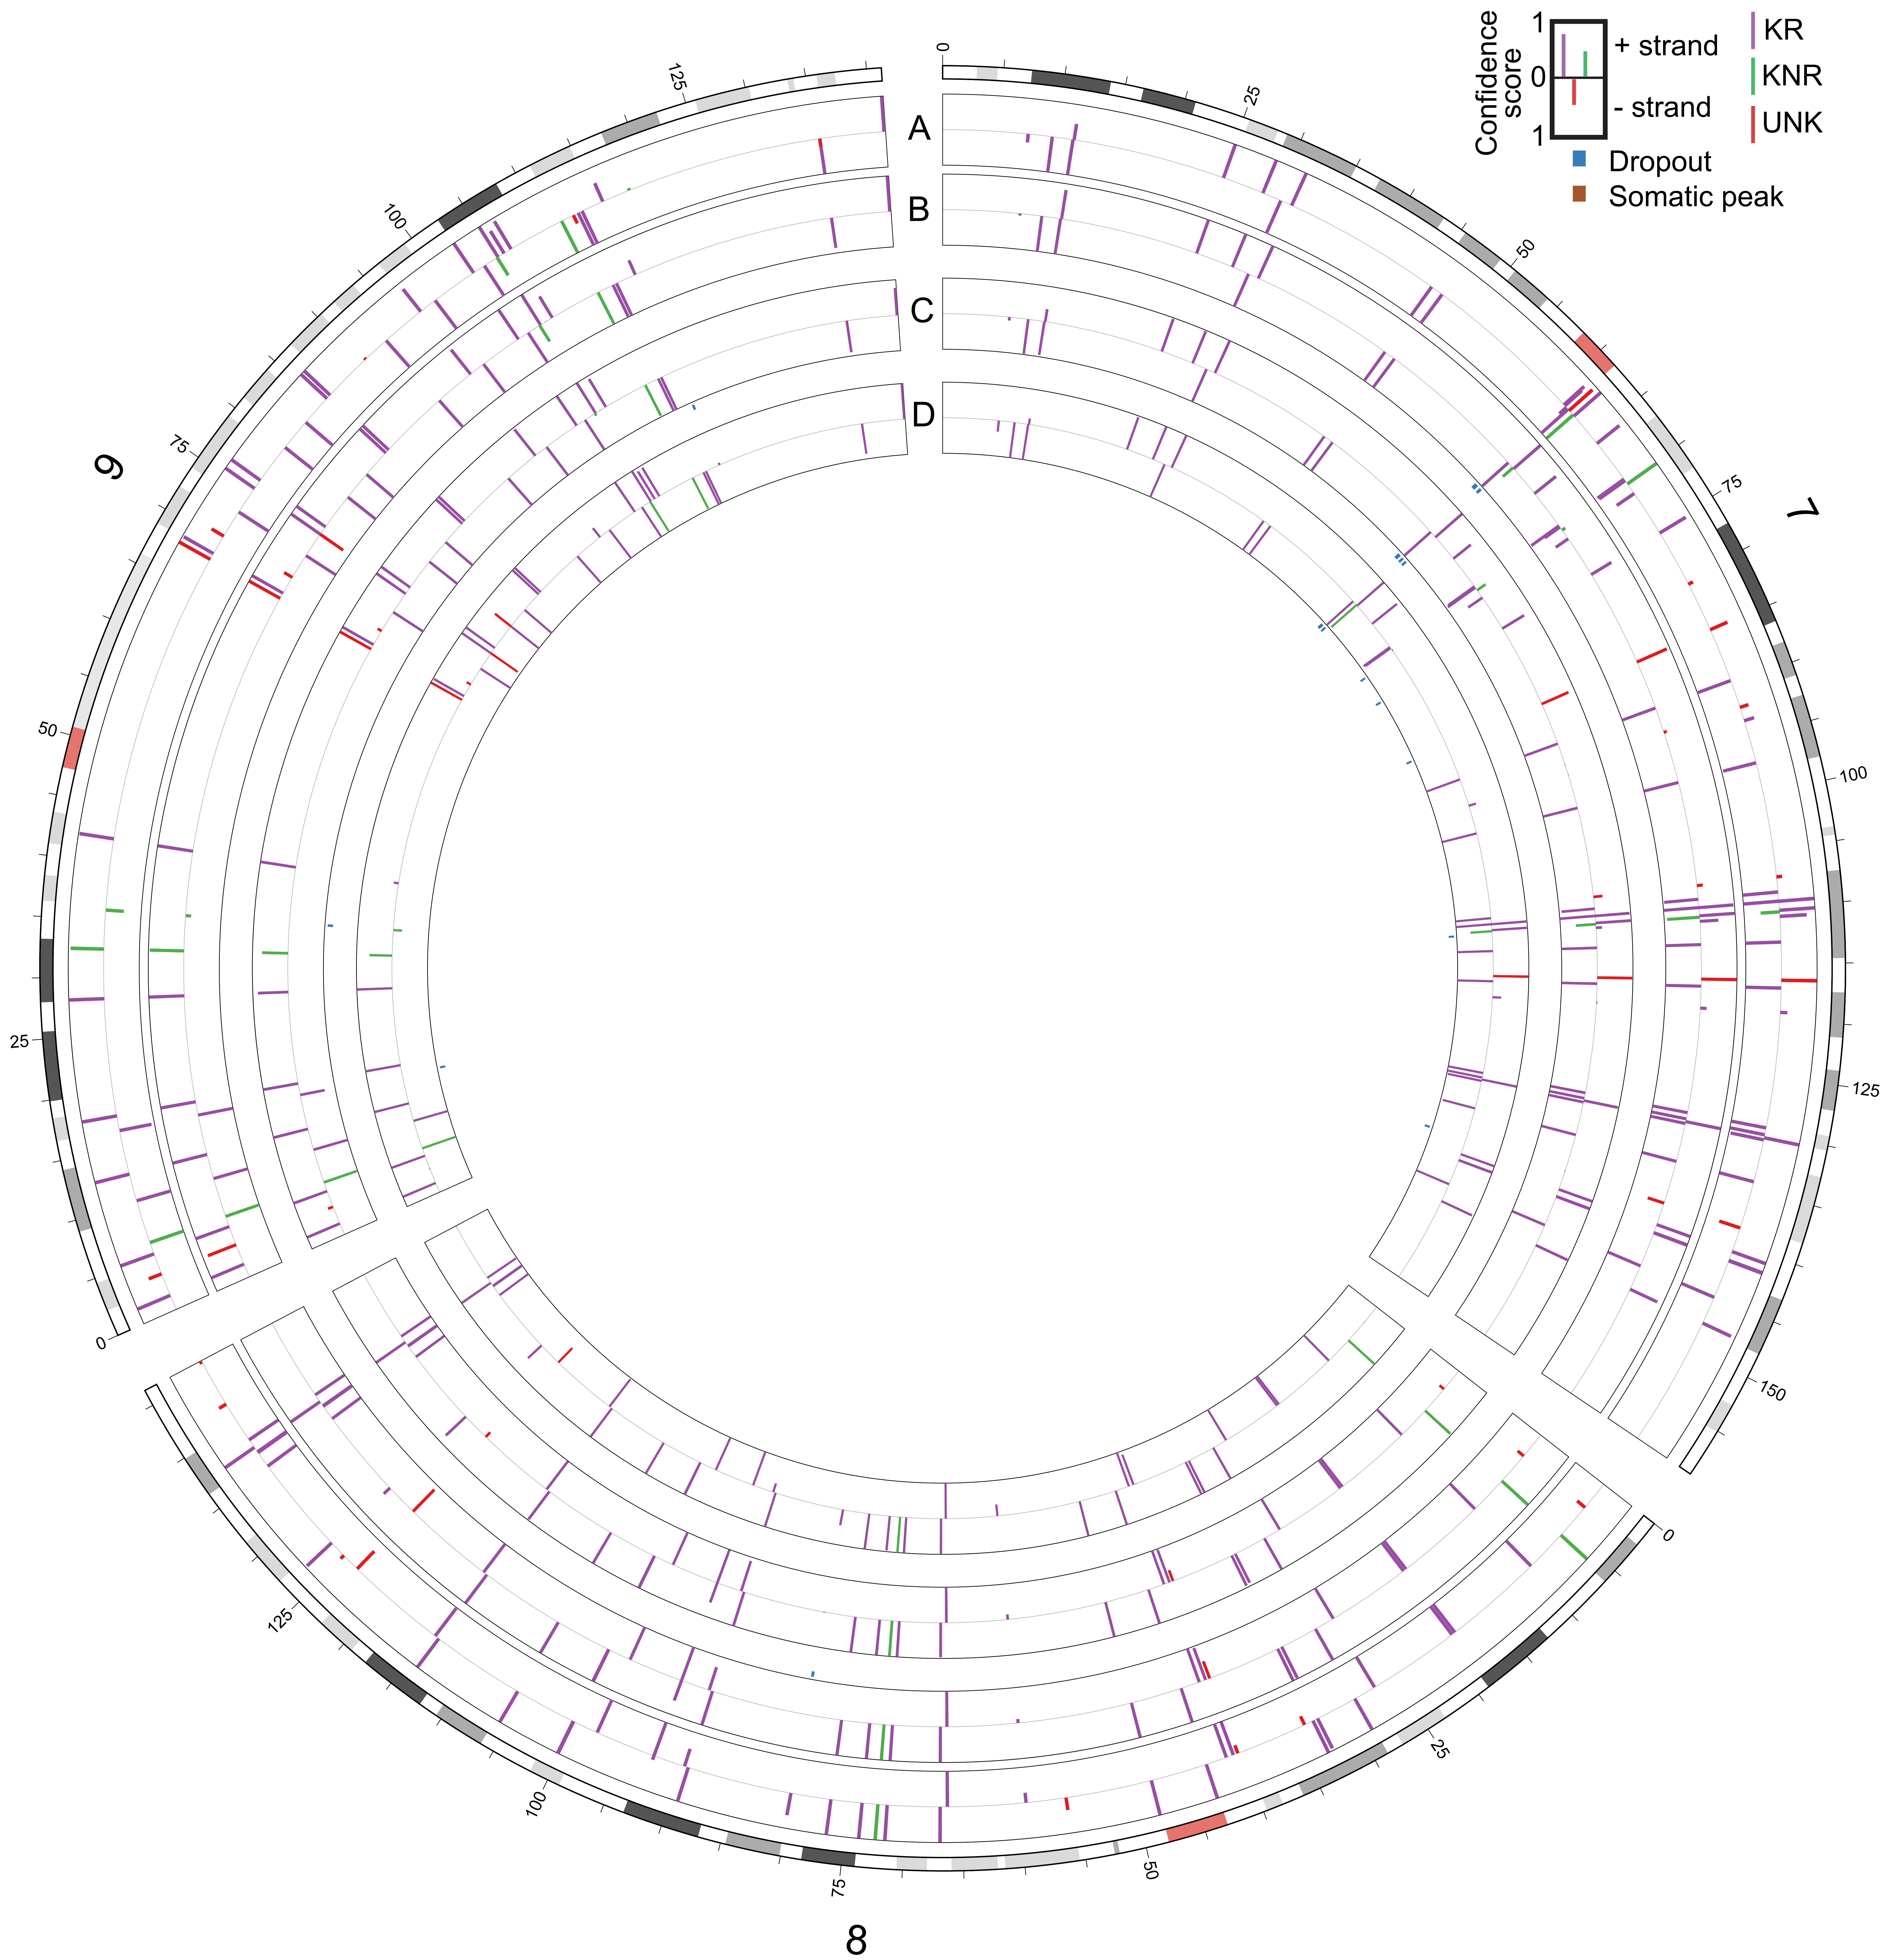

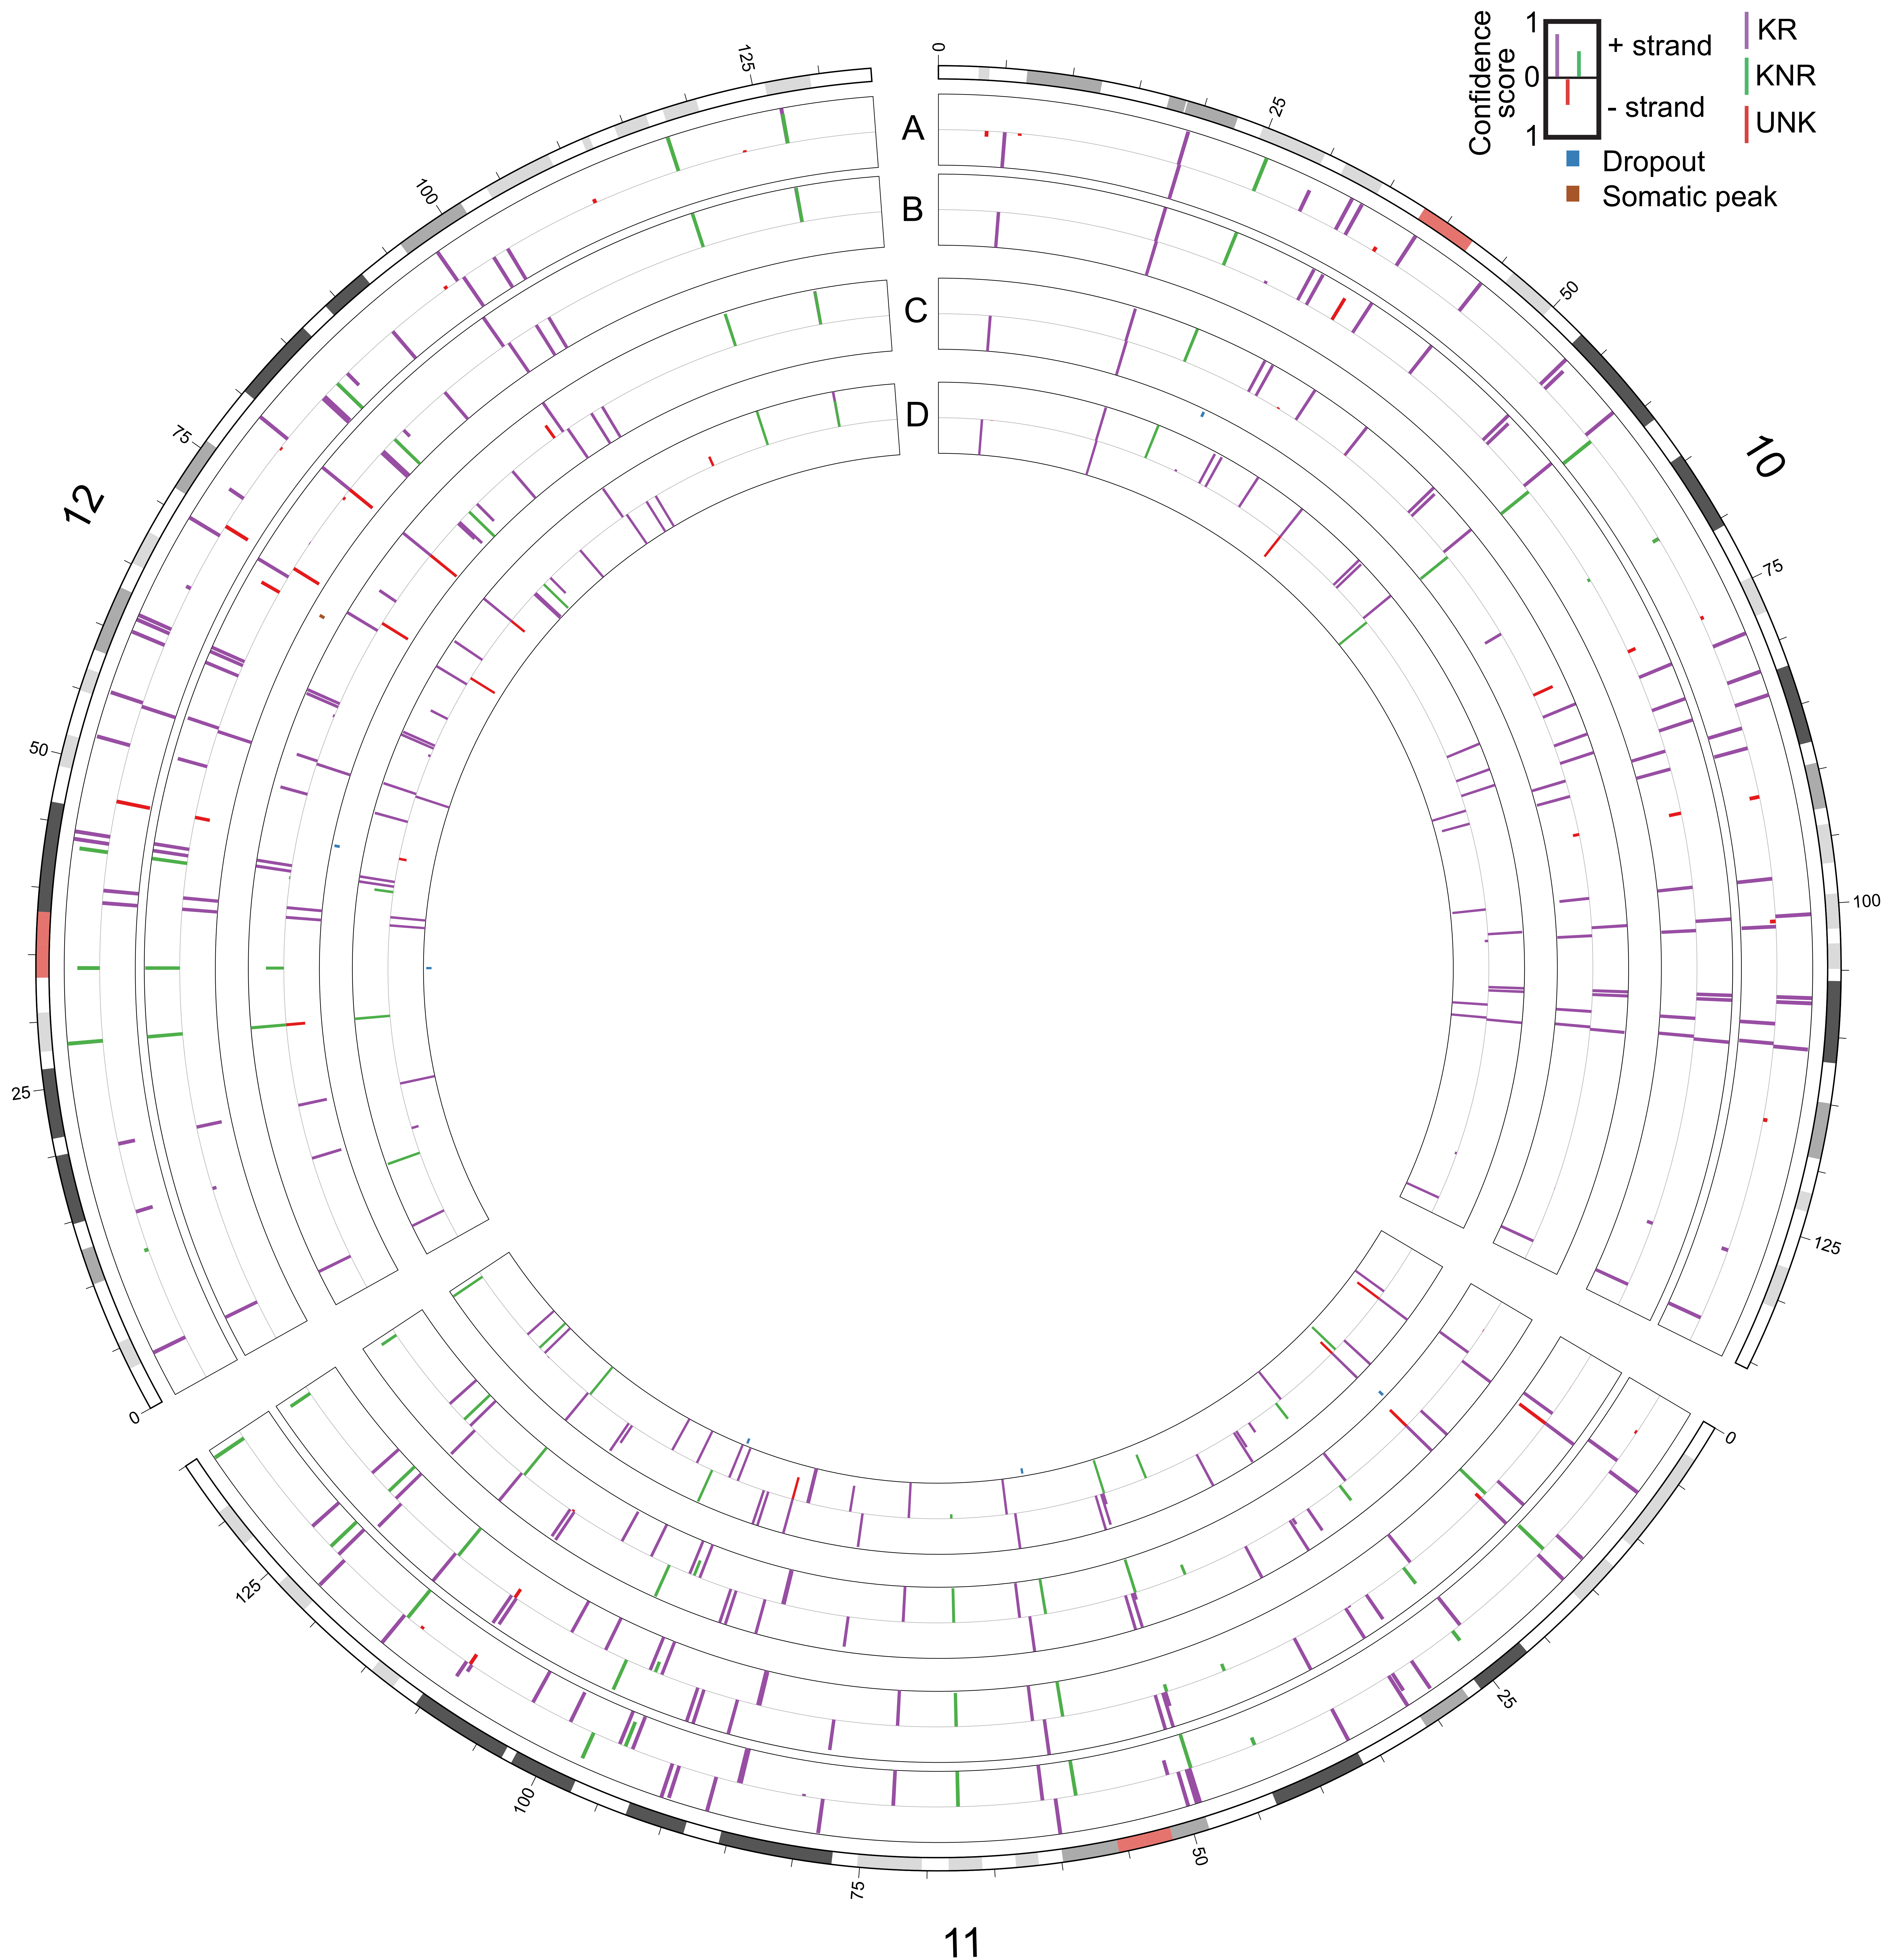

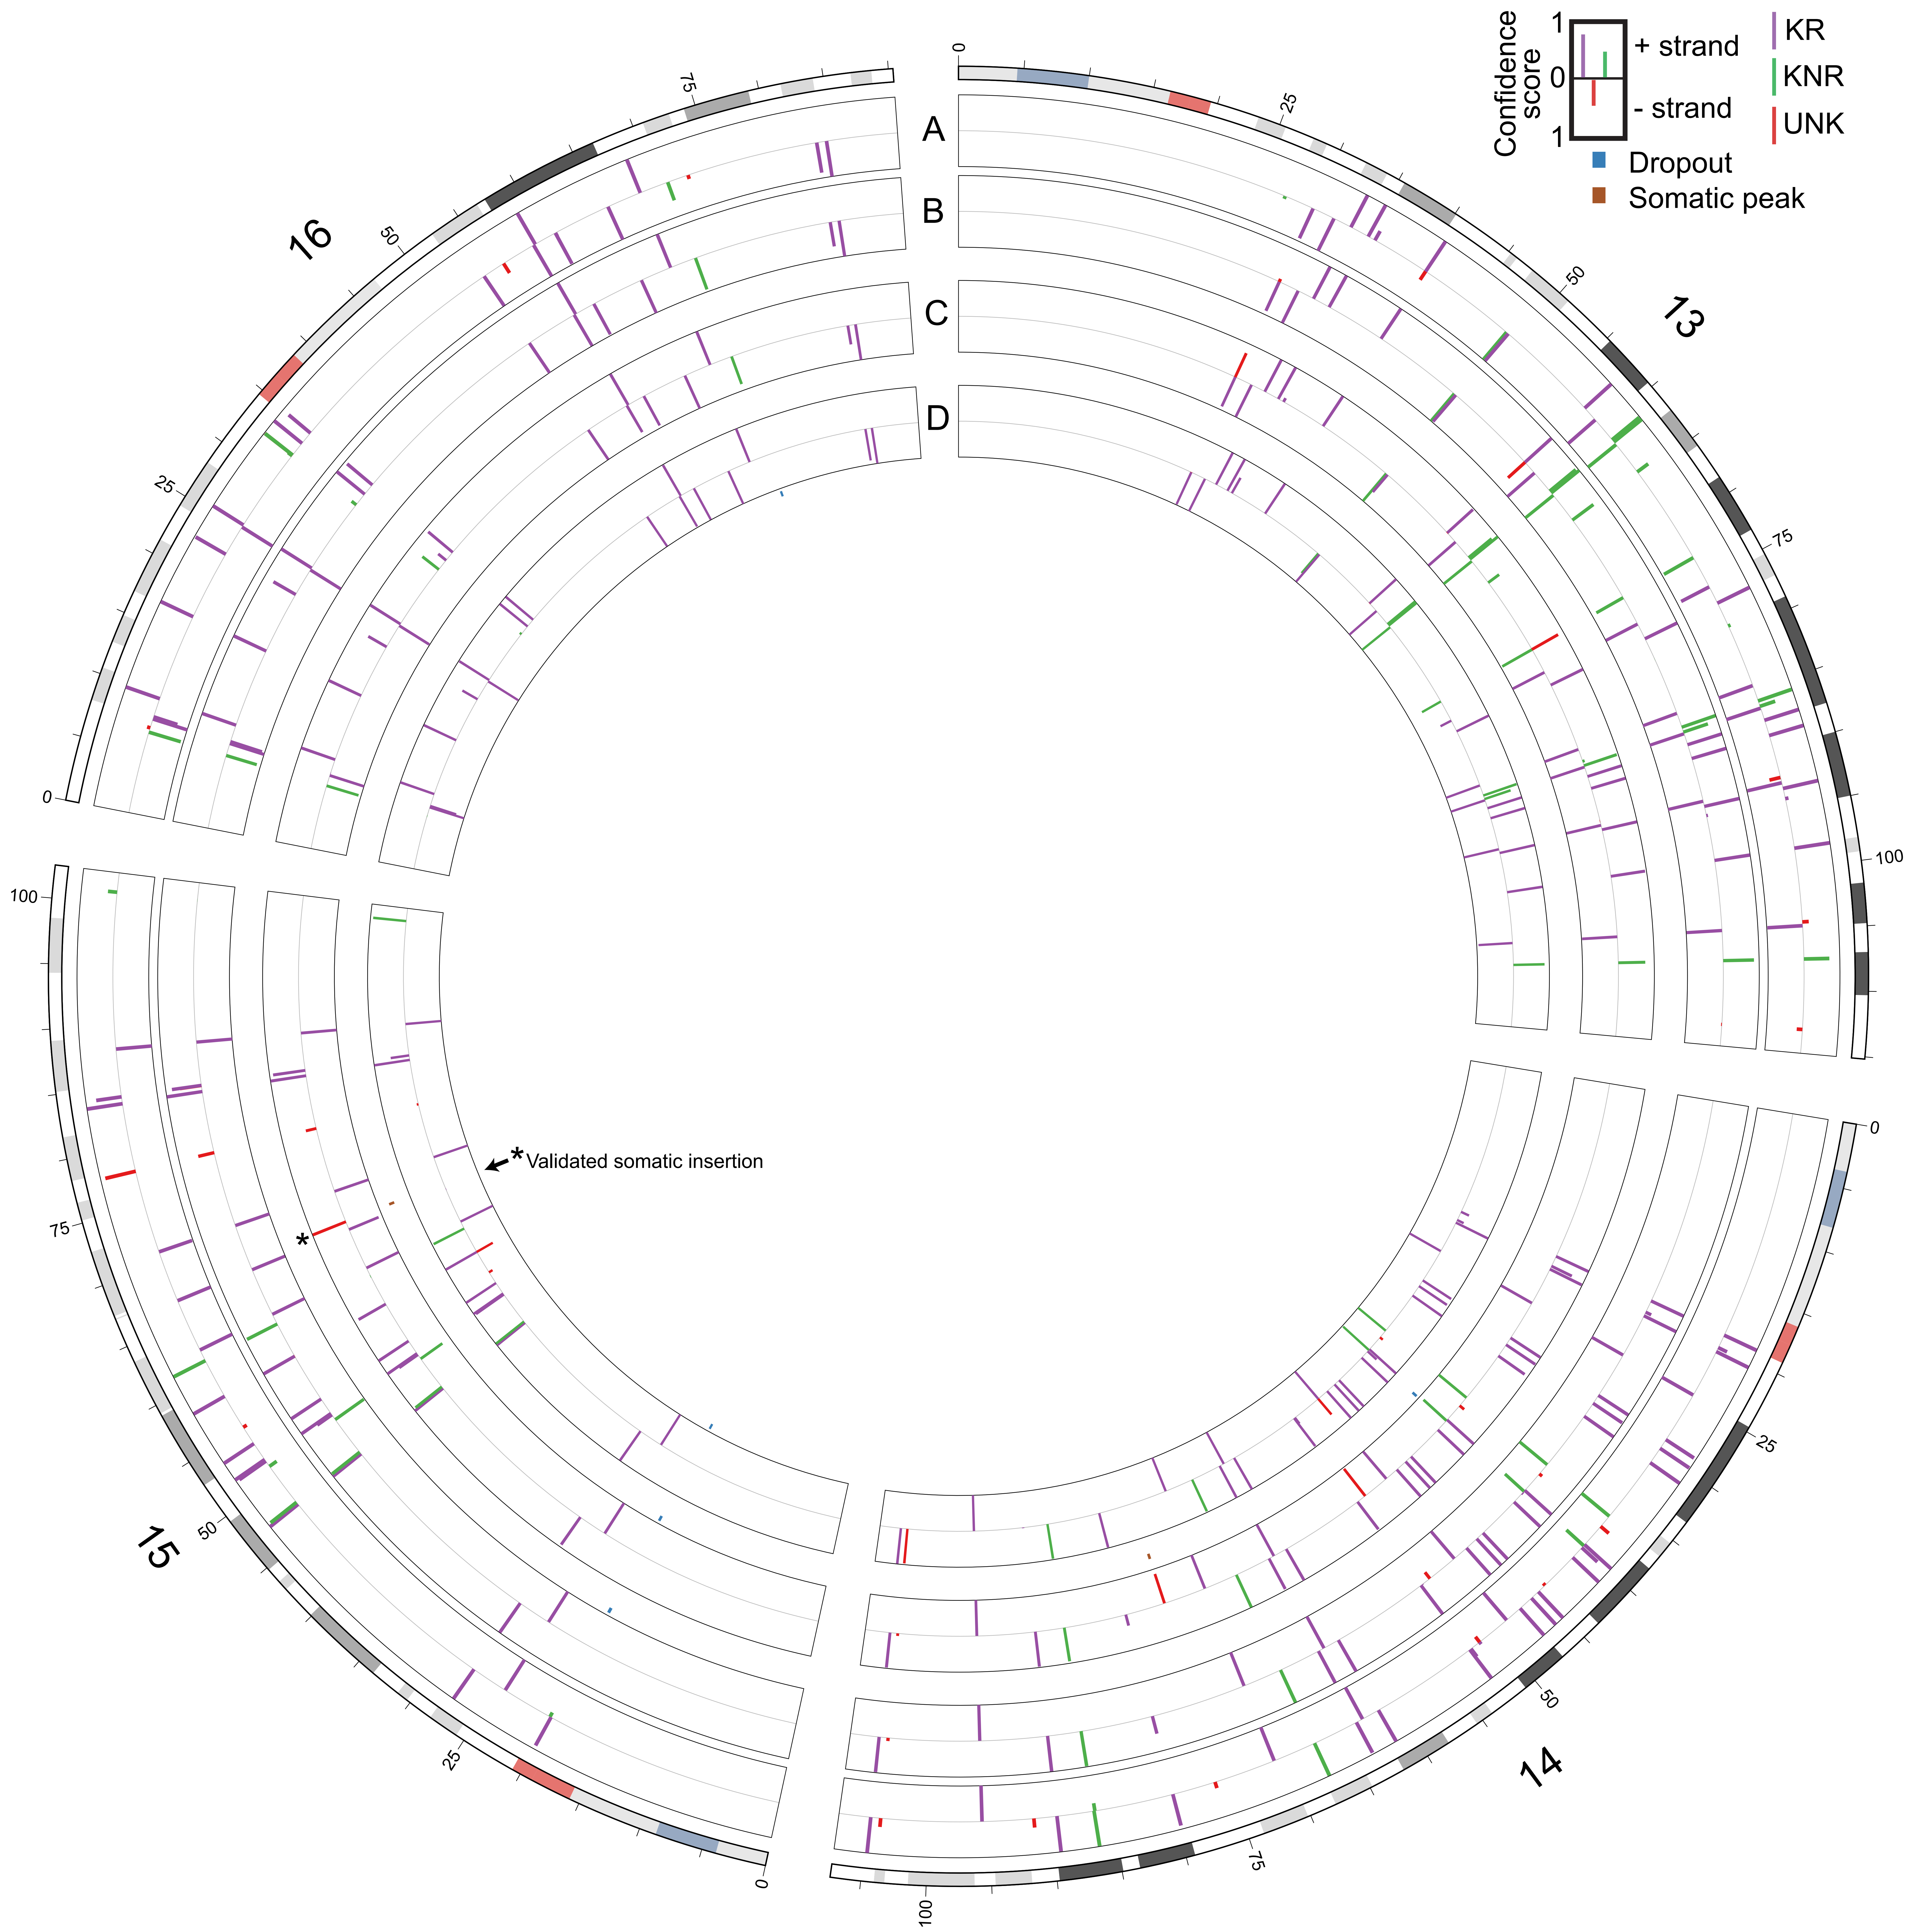

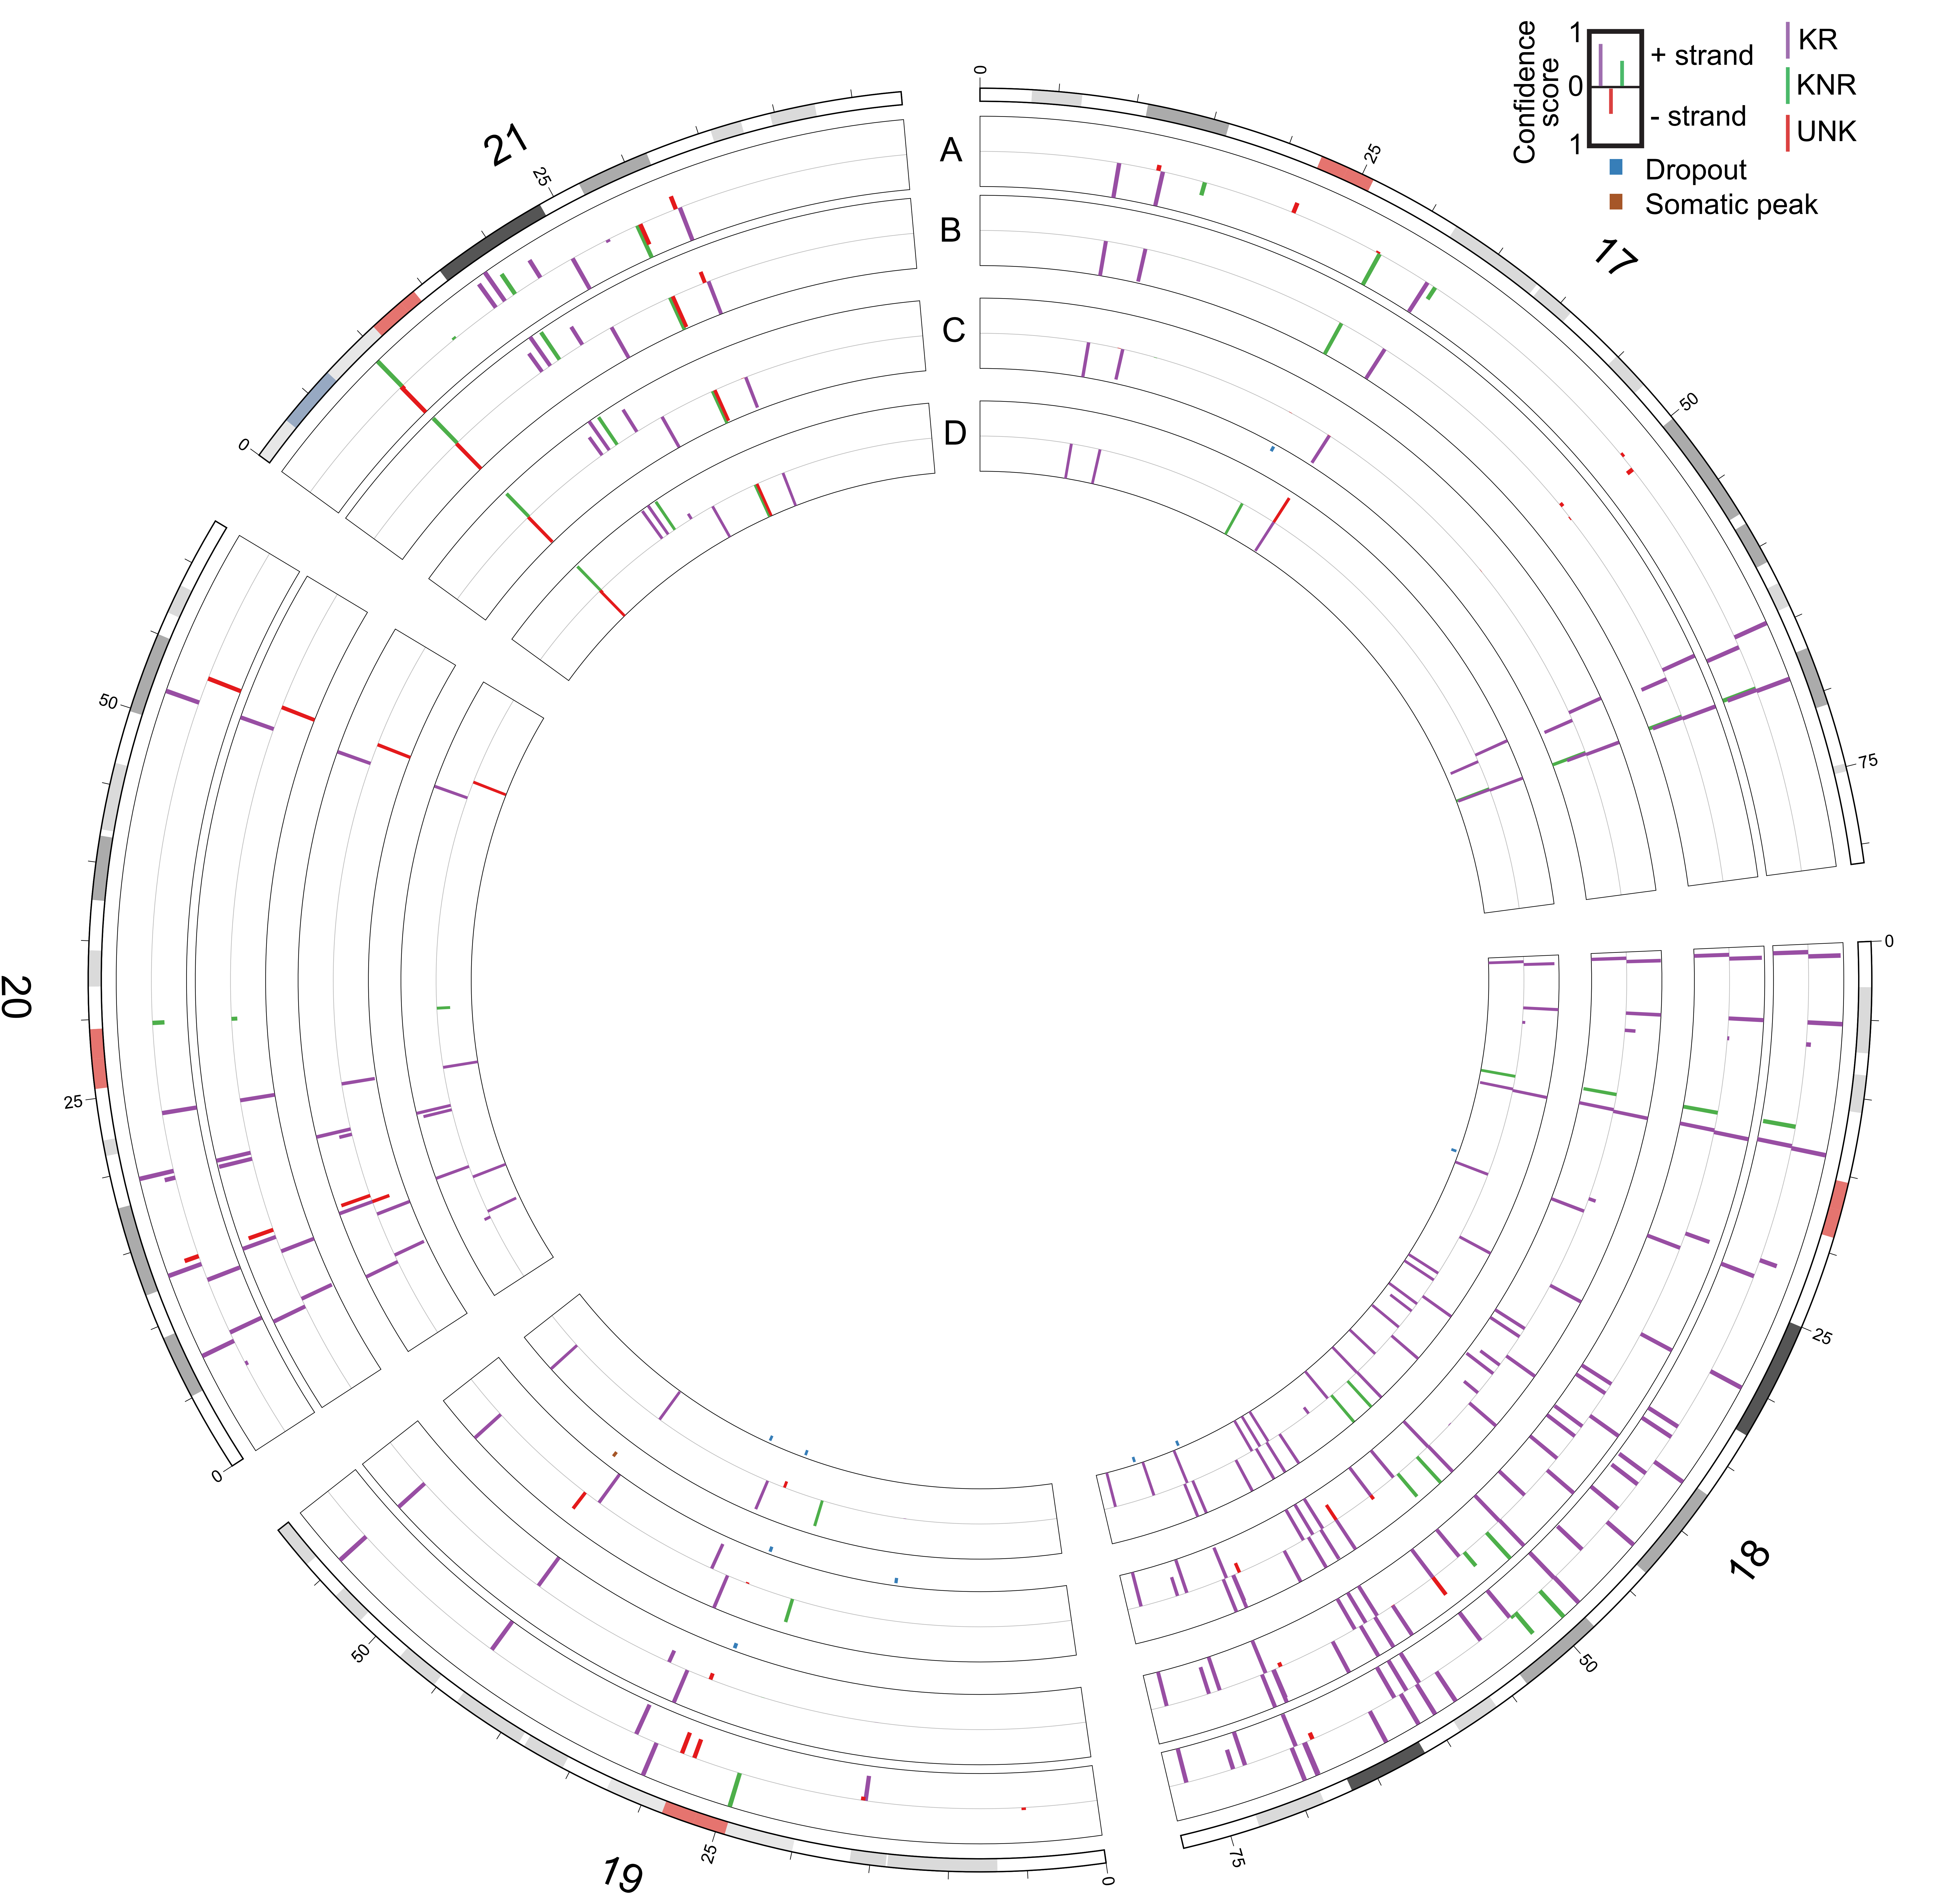

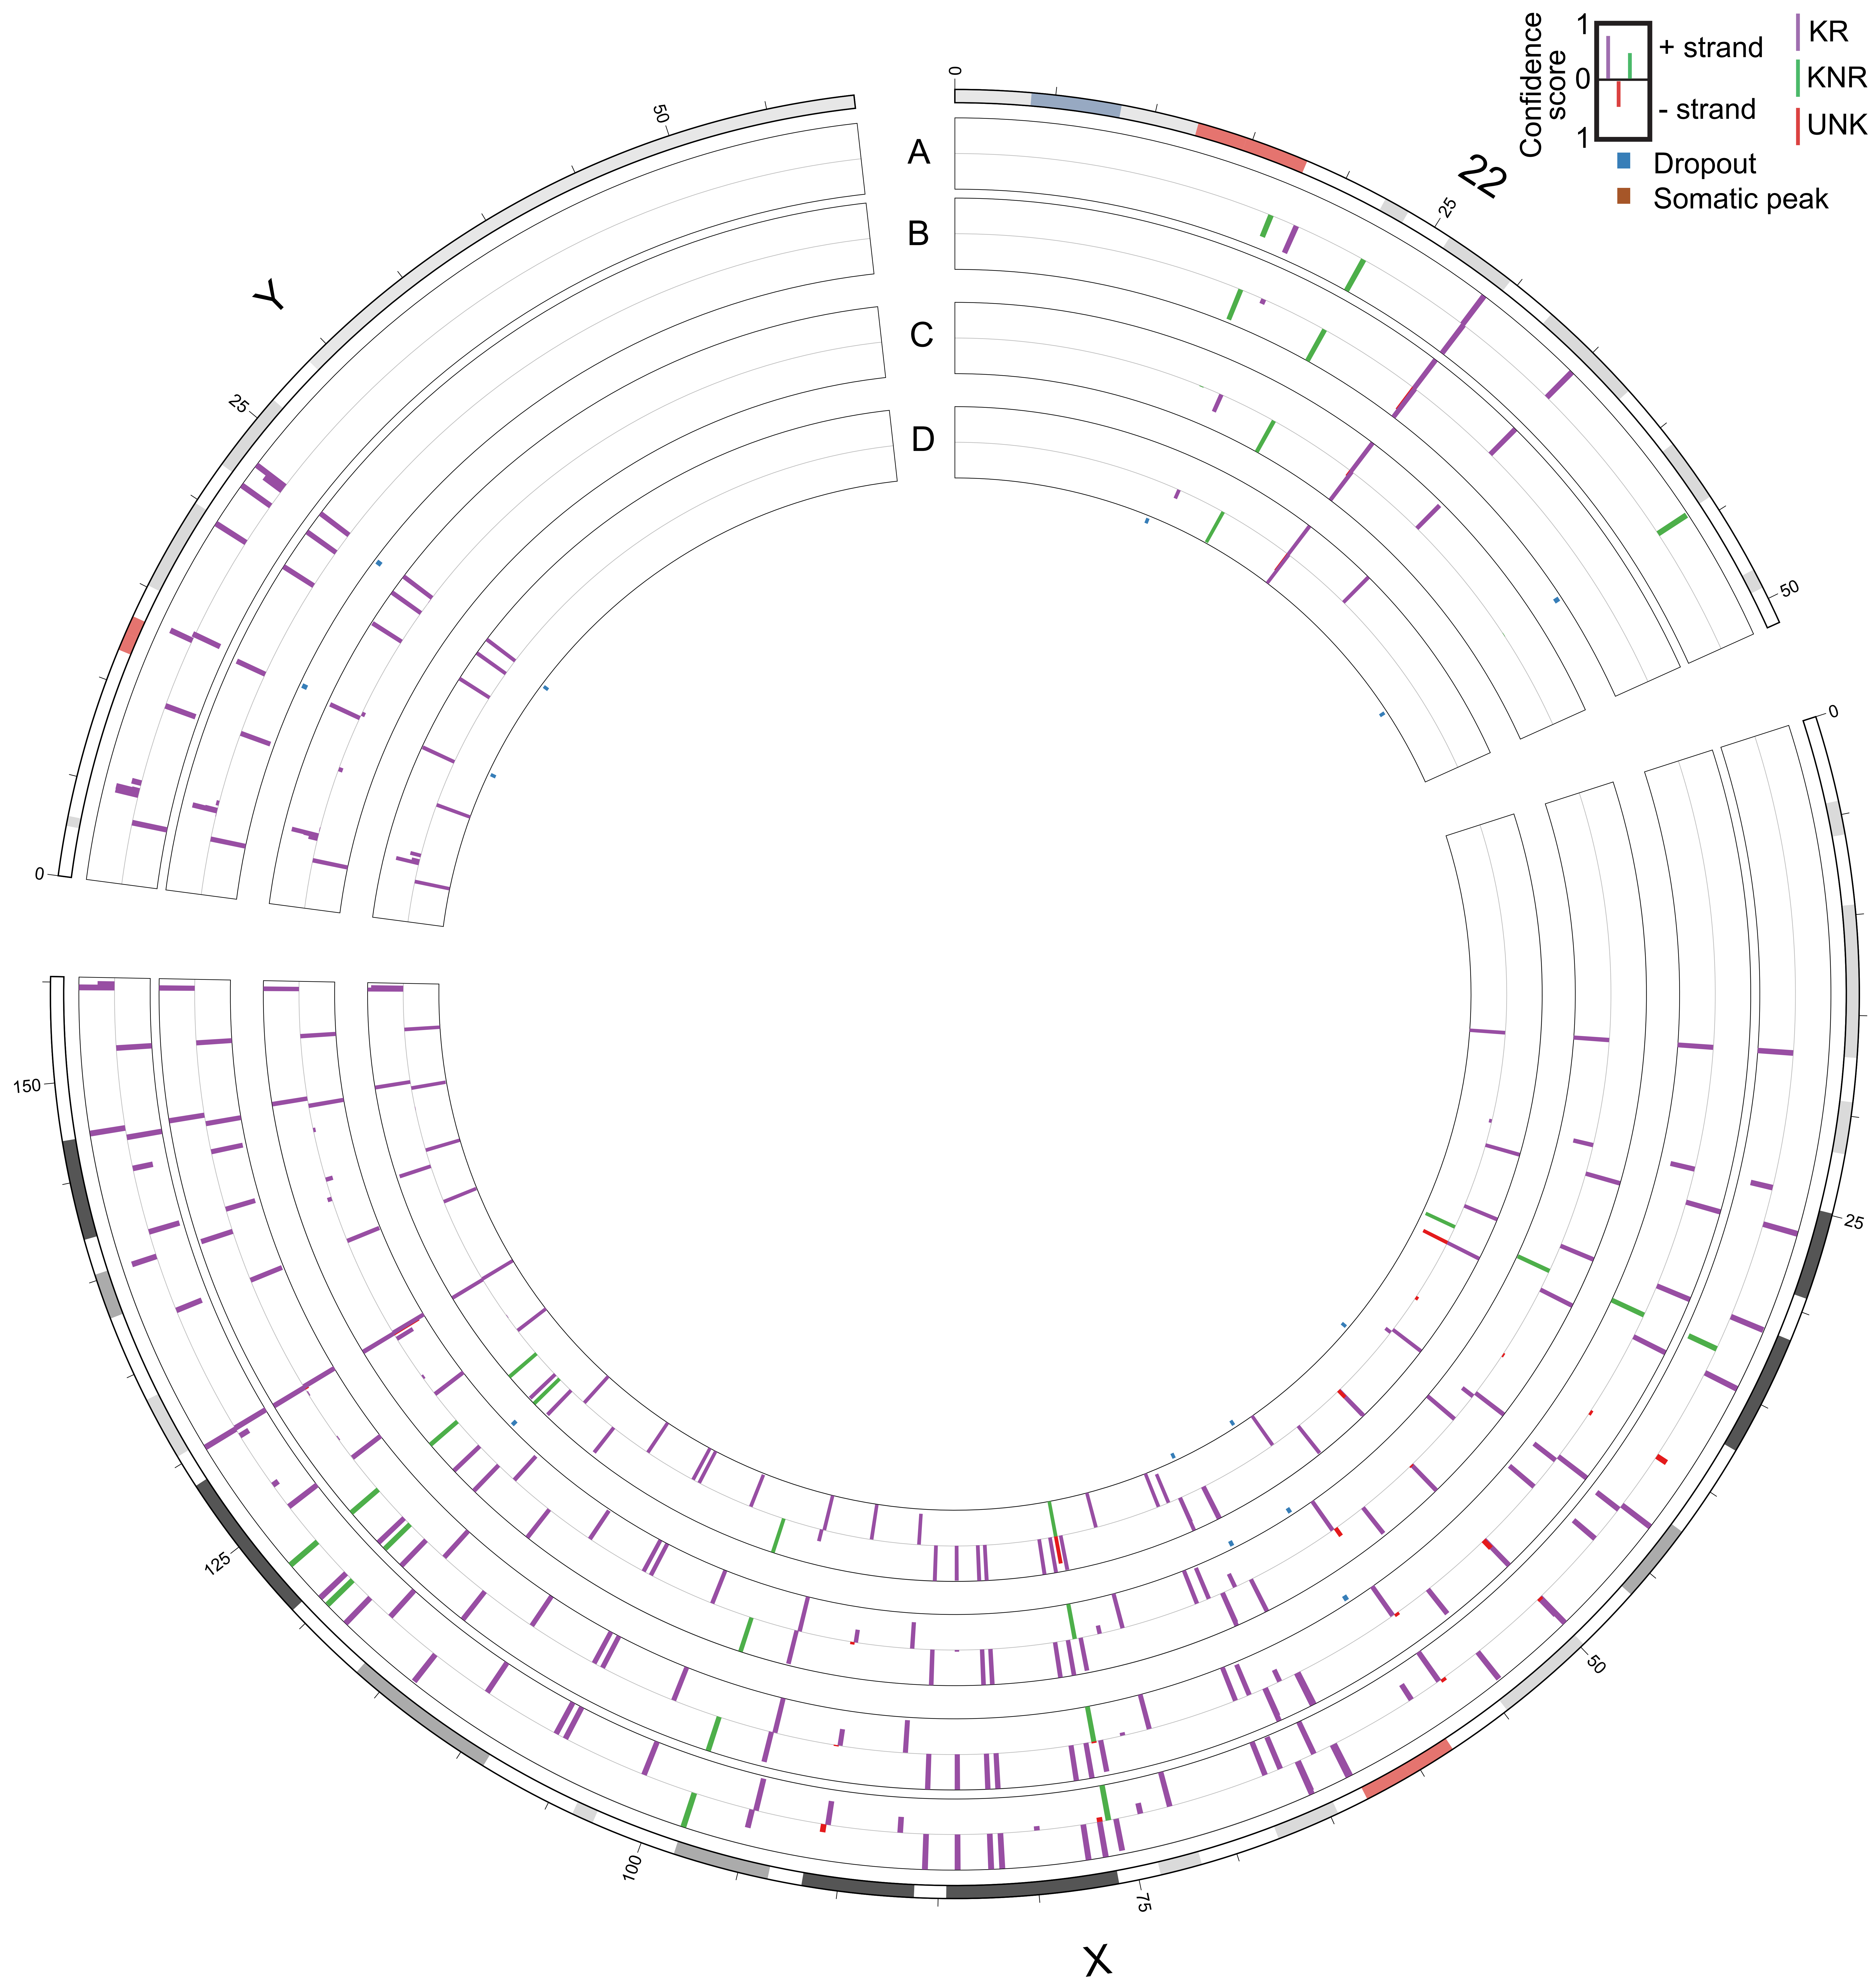

Supplement: NIHMS418331-supplement-05.pdf [file NIHMS418331-supplement-05.pdf]
